# Supplementary material for: Discovery of Novel Potential Insecticide-Resistance Mutations in Spodoptera frugiperda
Source: MDPI journal article supplement (doi:10.3390/insects15030186), 2024-03-11
Supplement: s1 [file s1]

## Article

# Discovery of Novel Potential Insecticide-Resistance Mutations in *Spodoptera frugiperda*

Yuhao Cai <sup>1</sup>, Huilin Chen <sup>2,3</sup>, Mengfan Hu <sup>1</sup>, Xuegui Wang <sup>2,3,\*</sup> and Lei Zhang <sup>1,\*</sup>

<sup>1</sup> Department of Entomology, China Agricultural University, Beijing 100193, China; caucaiyu@163.com (Y.C.); hmf1130@163.com (M.H.)

<sup>2</sup> State Key Laboratory of Crop Gene Exploration and Utilization in Southwest China, Sichuan Agricultural University, Chengdu 611130, China; chenhuilin5256@163.com

<sup>3</sup> College of Agriculture, Sichuan Agricultural University, Chengdu 611130, China

\* Correspondence: wangxuegui@sicau.edu.cn (X.W.); zhanglei86@cau.edu.cn (L.Z.)

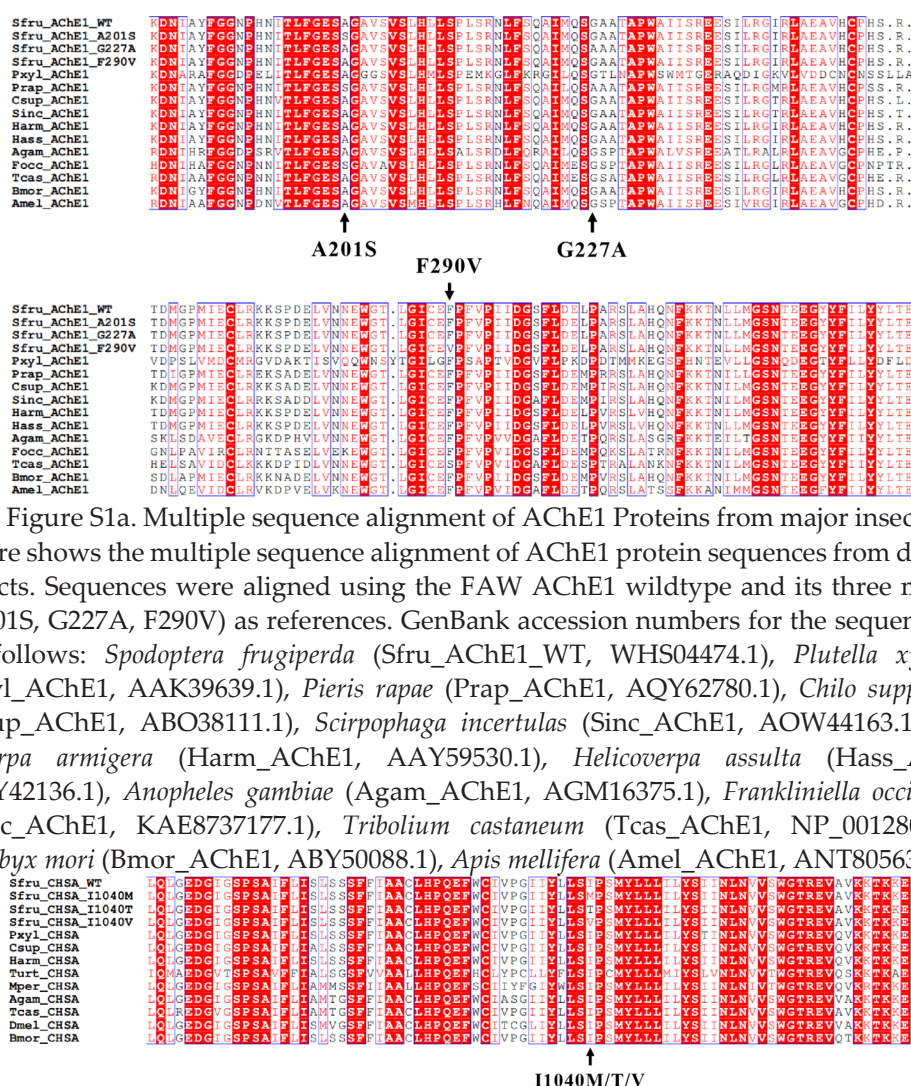

*persicae* (Mper\_CHSA, XP\_022169166.1), *Anopheles gambiae* (Agam\_CHSA, XP\_321336.5), *Tribolium castaneum* (Tcas\_CHSA, NP\_001034491.1), *Drosophila melanogaster* (Dmel\_CHSA, AAG09735.1), *Bombyx mori* (Bmor\_CHSA, XP\_037877645.1).

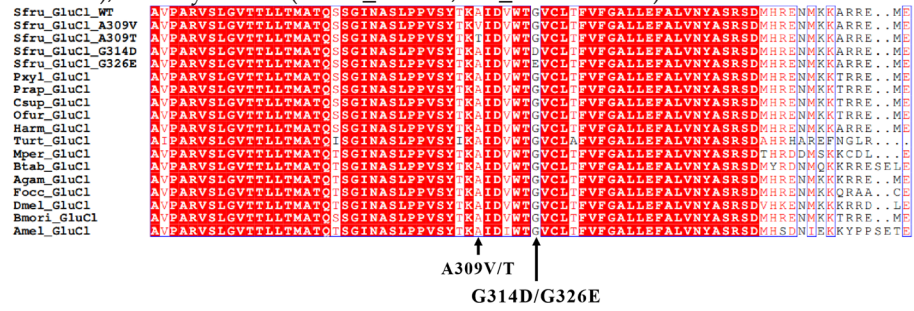

Figure S1c. Multiple sequence alignment of GluCl Proteins from major insects. This figure shows the multiple sequence alignment of GluCl protein sequences from different insects. Sequences were aligned using the FAW GluCl wildtype and its four mutants (A309V, A309T, G314D, G326E) as references. GenBank accession numbers for the sequences are as follows: *Spodoptera frugiperda* (Sfru\_GluCl\_WT, XP\_035452745.1), *Plutella xylostella* (Pxyl\_GluCl, XP\_011555227.1), *Pieris rapae* (Prap\_GluCl, XP\_022123036.1), *Chilo suppressalis* (Csup\_GluCl, UXG17918.1), *Ostrinia furnacalis* (Ofur\_GluCl, XP\_028160778.1), *Helicoverpa armigera* (Harm\_GluCl, XP\_021191008.1), *Tetranychus urticae* (Turt\_GluCl, XP\_015785428.1), *Myzus persicae* (Mper\_GluCl, XP\_022181801.1), *Bemisia tabaci* (Btab\_GluCl, AVL92931.1), *Anopheles gambiae* (Agam\_GluCl, AGS43089.1), *Frankliniella occidentalis* (Focc\_GluCl, AZZ73574.1), *Drosophila melanogaster* (Dmel\_GluCl, ABG57261.1), *Bombyx mori* (Bmor\_GluCl, BAO58781.1), *Apis mellifera* (Amel\_GluCl, XP\_006560231.1).

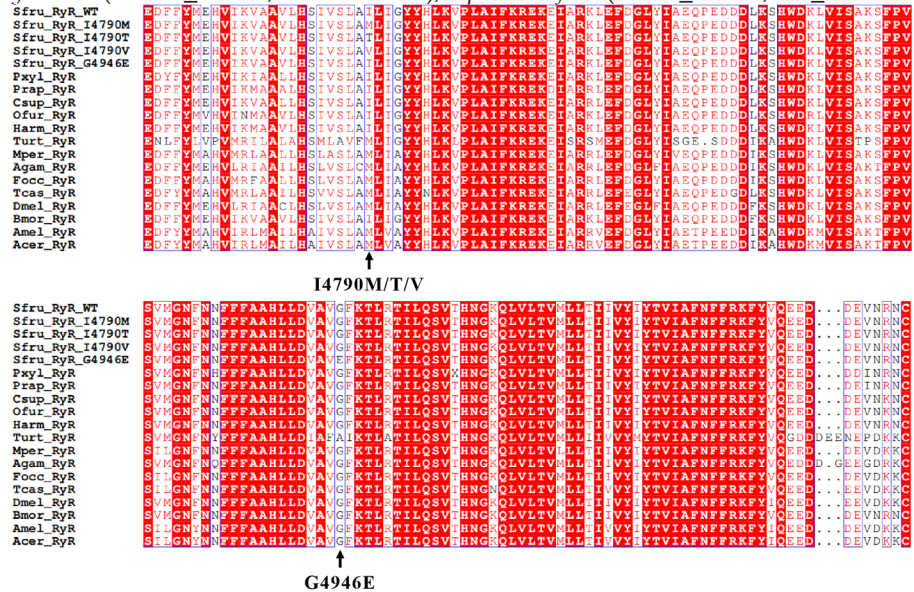

Figure S1d. Multiple sequence alignment of RyR Proteins from major insects. This figure shows the multiple sequence alignment of RyR protein sequences from different insects. Sequences were aligned using the FAW RyR wildtype and its four mutants (I4790M, I4790T, I4790T, G4946E) as references. GenBank accession numbers for the sequences are as follows: *Spodoptera frugiperda* (Sfru\_RyR\_WT, XP\_050555787.1), *Plutella xylostella* (Pxyl\_RyR, NP\_001296002.1), *Pieris rapae* (Prap\_RyR, XP\_045485471.1), *Chilo suppressalis* (Csup\_RyR, AFN70719.1), *Ostrinia furnacalis* (Ofur\_RyR, AGH68757.1), *Helicoverpa armigera* (Harm\_RyR, XP\_049707587.1), *Tetranychus urticae* (Turt\_RyR, BAK26392.1), *Myzus persicae* (Mper\_RyR, XP\_022160123.1), *Anopheles gambiae* (Agam\_RyR, XP\_318561.3), *Frankliniella occidentalis* (Focc\_RyR, XP\_052124088.1), *Tribolium castaneum* (Tcas\_RyR, NP\_001308588.1), *Drosophila melanogaster* (Dmel\_RyR, NP\_476991.1), *Bombyx mori* (Bmor\_RyR, XP\_037875957.1), *Apis mellifera* (Amel\_RyR, XP\_006569098.1), *Apis cerana* (Acer\_RyR, XP\_016920093.1).

Table S1. Primers for amplicon sequencing.

| Primer Name  | Primer Sequence (5' to 3')                  | Mutation                                                                    | Product length (bp) |
|--------------|---------------------------------------------|-----------------------------------------------------------------------------|---------------------|
| Sfru-ace-1-F | <u>ATCACGCCTGATGTACCGGGT</u> AATGCTG        | A201S/G227A/F290V                                                           | 500                 |
| Sfru-ace-1-R | <u>CGATGTTAACCTTCCTCCGTATTGGATCC</u>        |                                                                             |                     |
| FAW-VGSC-F1  | <u>TGACCAGGTTCCGCAGTAGCATAGGTGA</u>         | M918T/L925I/T929I/L932F/I936V                                               | 422                 |
| FAW-VGSC-R1  | <u>CACTCAAGTTACTCCATGATCACTTTGCTTG</u>      |                                                                             |                     |
| FAW-VGSC-F2  | <u>ACAGTGCAGATTACGTAGACCGTTTCCCG</u>        | L1014F/F1020S                                                               | 414                 |
| FAW-VGSC-R2  | <u>GCCAATCGTCGGCTACGTTACGTTTCAC</u>         |                                                                             |                     |
| FAW-VGSC-F3  | <u>TAGCTTATGGTATCATCAACGAGGAA-</u><br>GAGTG | F1845Y/V1848I                                                               | 302                 |
| FAW-VGSC-R3  | <u>ACTTGAATGTCGTAATCGTCGTCTGTGAG</u>        |                                                                             |                     |
| FAW-GluCl-F  | <u>GATCAGGTAACGACACTCCTCACGATGG</u>         | A309V/G314D/G326E                                                           | 261                 |
| FAW-GluCl-R  | <u>GTTTCGCGTGGTGTGCTATCTGTGTCG</u>          |                                                                             |                     |
| FAW-nAChR-F1 | <u>CGTACGTTACCTTGCCCTCCAGATTCT</u>          | G275E                                                                       | 423                 |
| FAW-nAChR-R1 | <u>CAGATCAGTACAGGAACACGCATCGAAT</u>         |                                                                             |                     |
| FAW-nAChR-F2 | <u>AGTCAATCTACAGAGCGAACTTGTTGCA</u>         | IIA deletion(the three amino acid (IIA) deletion at the $\alpha 2$ subunit) | 367                 |
| FAW-nAChR-R2 | <u>AGTTCCTACGACACCATGATGTGCG</u>            |                                                                             |                     |
| Sfru-ChSA-F  | <u>ATGTCAATCTCCTTCGGCTATATTCTTGAT</u>       | I1040M                                                                      | 208                 |
| Sfru-ChSA-R  | <u>CCGTCCCTTCGTCTTCTTAAGTCCCACTTC</u>       |                                                                             |                     |
| Sfru-RyR-F1  | <u>ACTGATACAACCTCCTCTACTCTC</u>             | G4946E                                                                      | 151                 |
| Sfru-RyR-R1  | <u>GAGTGGTGTTTTCCGTTATGCGTGAC</u>           |                                                                             |                     |
| Sfru-RyR-F2  | <u>ATGAGCGACGAGGACTTCTTCTACATGGA</u>        | I4790M                                                                      | 102                 |
| Sfru-RyR-R2  | <u>CAAAAGCACCTTGAGATGGTAGTACCCGA</u>        |                                                                             |                     |

Table Note: The label sequence for each primer is underlined.

Table S2. Concentration of amplicon library.

| Sample Name | Concentration (ng/ $\mu$ L) | Volume ( $\mu$ L) | Total ( $\mu$ g) |
|-------------|-----------------------------|-------------------|------------------|
| CX1         | 36.8                        | 94.0              | 3.459            |
| CX2         | 44.4                        | 105.0             | 4.662            |
| CX3         | 50.2                        | 100.0             | 5.020            |
| DC1         | 50.8                        | 78.0              | 3.962            |
| DC2         | 45.8                        | 93.0              | 4.259            |
| DC3         | 49.0                        | 89.0              | 4.361            |
| HD1         | 80.6                        | 70.0              | 5.642            |
| HD2         | 55.2                        | 87.0              | 4.802            |
| HD3         | 53.8                        | 83.0              | 4.465            |
| MY1         | 33.4                        | 96.0              | 3.206            |
| MY2         | 48.6                        | 81.0              | 3.937            |
| MY3         | 57.6                        | 65.0              | 3.744            |
| NB1         | 60.2                        | 85.0              | 5.117            |
| NB2         | 36.2                        | 90.0              | 3.258            |
| NB3         | 46.4                        | 65.0              | 3.016            |
| RH1         | 48.4                        | 75.0              | 3.630            |
| RH2         | 49.2                        | 80.0              | 3.936            |
| RH3         | 51.2                        | 85.0              | 4.352            |

Table Note: The concentration of 18 amplicon libraries varied between 33.4 and 80.6 ng/ $\mu$ L, and the total volume of libraries varied from 3.016 to 5.642  $\mu$ g, indicating that the library reached a concentration of 24 ng/ $\mu$ L with a total quantity greater than 2.5  $\mu$ g, meeting the necessary standards for subsequent amplicon sequencing studies.



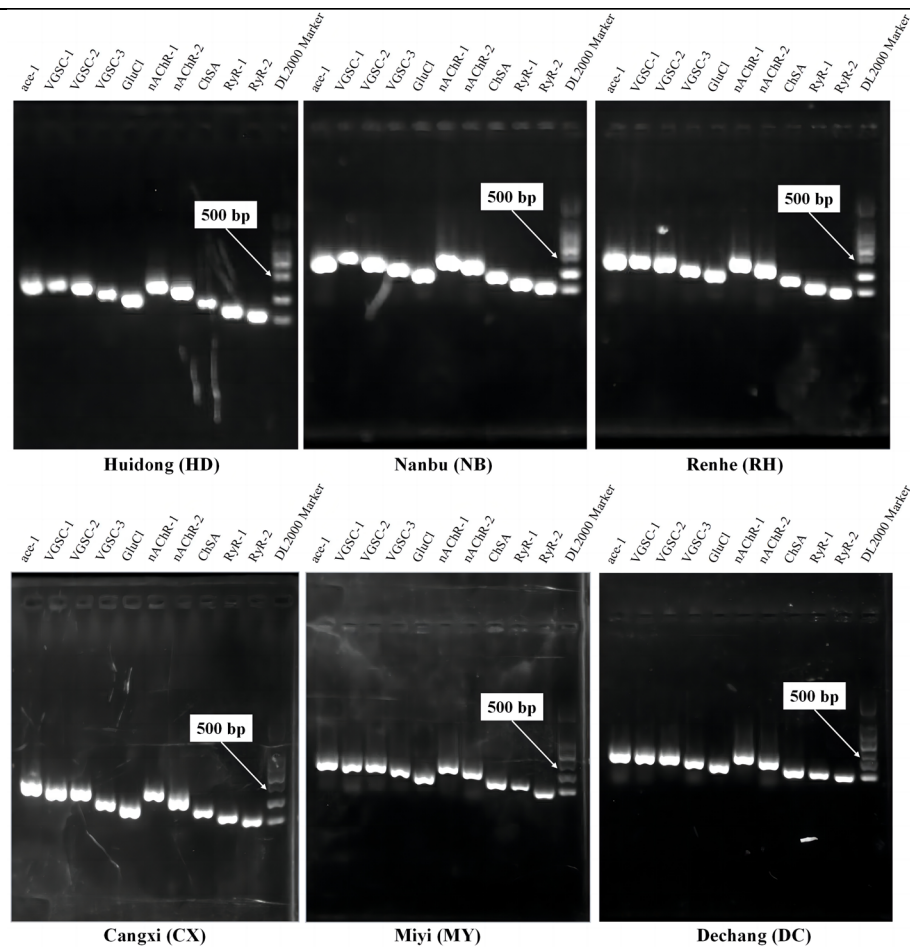

Figure S2. Electrophoresis of PCR products for construction of amplicon library. The electrophoresis bands are labeled from left to right, with each band corresponding to a specific "Primer Name" (-F pairs -R) from Table A1. Starting from the leftmost band, the mapping follows the order of rows from top to bottom in Table A1.

Table S3. Overview of amplicon sequencing data output quality.

| Sample | Library Name     | Raw Reads  | Clean Reads | Raw Base(G) | Clean Base(G) | Effective(%) | Error(%) | Q20(%) | Q30(%) | GC(%) |
|--------|------------------|------------|-------------|-------------|---------------|--------------|----------|--------|--------|-------|
| CX1    | FDDP230114884-1a | 2575124.00 | 2214346.00  | 0.64        | 0.55          | 85.99        | 0.03     | 95.71  | 89.78  | 47.71 |
| CX2    | FDDP230114885-1a | 1977974.00 | 1661776.00  | 0.49        | 0.42          | 84.01        | 0.03     | 96.01  | 90.19  | 46.55 |
| CX3    | FDDP230114886-1a | 1989294.00 | 1756752.00  | 0.50        | 0.44          | 88.31        | 0.03     | 95.65  | 89.01  | 47.31 |
| DC1    | FDDP230114887-1a | 2551422.00 | 2023382.00  | 0.64        | 0.51          | 79.30        | 0.03     | 95.45  | 89.43  | 47.53 |
| DC2    | FDDP230114888-1a | 2480310.00 | 2067156.00  | 0.62        | 0.52          | 83.34        | 0.03     | 95.93  | 90.15  | 47.25 |
| DC3    | FDDP230114889-1a | 2221740.00 | 1942380.00  | 0.56        | 0.49          | 87.43        | 0.03     | 96.02  | 90.22  | 47.02 |
| HD1    | FDDP230114890-1a | 2108266.00 | 1675658.00  | 0.53        | 0.42          | 79.48        | 0.04     | 93.52  | 86.69  | 47.06 |
| HD2    | FDDP230114891-1a | 1407424.00 | 1111192.00  | 0.35        | 0.28          | 78.95        | 0.04     | 93.19  | 86.40  | 47.69 |
| HD3    | FDDP230114892-1a | 1902920.00 | 1736554.00  | 0.48        | 0.43          | 91.26        | 0.03     | 95.86  | 89.90  | 47.93 |
| MY1    | FDDP230114893-1a | 1872842.00 | 1477370.00  | 0.47        | 0.37          | 78.88        | 0.04     | 92.65  | 85.72  | 47.78 |
| MY2    | FDDP230114894-1a | 1524890.00 | 613476.00   | 0.38        | 0.15          | 40.23        | 0.03     | 93.78  | 87.31  | 46.37 |
| MY3    | FDDP230114895-1a | 2136224.00 | 1942356.00  | 0.53        | 0.49          | 90.92        | 0.03     | 95.81  | 89.84  | 47.02 |
| NB1    | FDDP230114896-1a | 1345378.00 | 1168196.00  | 0.34        | 0.29          | 86.83        | 0.04     | 93.78  | 87.13  | 46.31 |
| NB2    | FDDP230114897-1a | 2008494.00 | 1721566.00  | 0.50        | 0.43          | 85.71        | 0.03     | 95.38  | 89.31  | 46.72 |
| NB3    | FDDP230114898-1a | 2665674.00 | 2321344.00  | 0.67        | 0.58          | 87.08        | 0.03     | 95.79  | 89.88  | 46.78 |
| RH1    | FDDP230114899-1a | 2476146.00 | 1997832.00  | 0.62        | 0.50          | 80.68        | 0.03     | 95.33  | 89.23  | 47.35 |
| RH2    | FDDP230114900-1a | 2644544.00 | 2449238.00  | 0.66        | 0.61          | 92.61        | 0.03     | 95.86  | 89.96  | 46.66 |
| RH3    | FDDP230114901-1a | 2171578.00 | 2078182.00  | 0.54        | 0.52          | 95.70        | 0.03     | 95.90  | 89.97  | 47.08 |
